# Supplementary material for: Lowering the charge voltage of Li–O2 batteries via an unmediated photoelectrochemical oxidation approach
Source: Royal Society of Chemistry journal article supplement (doi:10.1039/c6ta03583c), 2016-01-01
Supplement: c6ta03583c1.pdf [file c6ta03583c1.pdf]

## **Lowering charge voltage of Li-O<sub>2</sub> batteries via an unmediated photoelectrochemical oxidation approach**

Yang Liu,<sup>a,b</sup> Na Li,<sup>a,\*</sup> Kaiming Liao,<sup>a</sup> Qi Li,<sup>a,b</sup> Masayoshi Ishida<sup>b</sup> and Haoshen Zhou<sup>a,b,c,\*</sup>

<sup>a</sup>Energy Technology Research Institute, National Institute of Advanced Industrial Science and Technology (AIST), Umezono 1-1-1, Tsukuba, 305-8568, Japan.

E-mail: [hs.zhou@aist.go.jp](mailto:hs.zhou@aist.go.jp) or [nli.ri@aist.go.jp](mailto:nli.ri@aist.go.jp)

<sup>b</sup>Graduate School of System and Information Engineering, University of Tsukuba, 1-1-1, Tennoudai, Tsukuba, 305-8573, Japan.

<sup>c</sup>National Laboratory of Solid State Microstructures and Department of Energy Science and Engineering, Nanjing University, Nanjing, 210093, China.

## Experimental Section

*Synthesis of g-C<sub>3</sub>N<sub>4</sub>-CP electrode:* The g-C<sub>3</sub>N<sub>4</sub>-CP was synthesized as follows: the guanidine hydrochloride (GundCl) and polyvinylidene fluoride (PVDF) powder were mixed with a mass ratio of 95:5, dissolving in N-methyl pyrrolidine (NMP) solvent, and the slurry was grinded for 30 min to blend uniformly. Then the carbon paper (diameter is 7 mm) was dipped into the resulting solution and pasted with the slurry. The g-C<sub>3</sub>N<sub>4</sub>-CP was obtained after calcination at 550 °C for 3h under Ar flow of 100 ml min<sup>-1</sup> with a ramp rate of 2.3 °C min<sup>-1</sup>; The cooling rate was kept at around 1 °C min<sup>-1</sup>. The loading mass of g-C<sub>3</sub>N<sub>4</sub> in g-C<sub>3</sub>N<sub>4</sub>/carbon paper electrode is about 0.4 mg cm<sup>-2</sup>. The weight ratio between CP (~2.4 mg) and C<sub>3</sub>N<sub>4</sub> (0.4 mg) is about 6 : 1.

*The photoassisted Li-O<sub>2</sub> Battery assemble:* The battery assembly was performed in an Ar gas filled glovebox using 2023 coin cell with 7 holes at the top, which enable the illumination on the electrode. The electrolyte was consist of 1 M Lithium bis(trifluoromethanesulfonyl)imide (LiTFSI, Sigma) dissolved in Tetraglyme (G4, WAKO). The photoassisted Li-O<sub>2</sub> battery was comprised with a Li metal as anode, a glass fiber filled with electrolyte and a g-C<sub>3</sub>N<sub>4</sub>-CP as oxygen electrode and photoelectrode. The assembled Li-O<sub>2</sub> battery was stored in a sealed glass chamber with a volume capacity of 650 mL, and purged with O<sub>2</sub> before the electrochemical investigation. The light source used for the illumination is a XEF-501S Xe-lamp (San-ei Electric Co., Japan). The charging/discharging tests for the all batteries were performed at different current densities by using a Hokuto electrochemical machine.

*Characterization:* X-ray diffraction (XRD) were carried out by a Bruker D8 X-ray

diffractometer using Cu K $\alpha$  ( $\lambda=1.54 \text{ \AA}$ ) radiation. The chemical composition of g-C<sub>3</sub>N<sub>4</sub>-CP was characterized by X-ray photoelectron spectroscopy (XPS, Thermo Escalab 250, with a monochromatic Al K $\alpha$  X-ray source). Scanning electronic microscope (SEM) was observed on a Hitachi S4800. Galvanostatic discharge/charge was conducted on a Hokuto discharging/charging system. FTIR was obtained on a JASCO instrument of FT/IR-6200 from 1300 to 900 cm<sup>-1</sup> with a resolution of 2 cm<sup>-1</sup>.

| Summary of redox potentials of redox mediators |                     |           |
|------------------------------------------------|---------------------|-----------|
| Redox mediator                                 | Redox potential (V) | Reference |
| OMAB <sup>-</sup> /OMAB                        | 3.16                | 1         |
| TMPD <sup>-</sup> /TMPD                        | 3.33                | 2         |
| DEQ <sup>+</sup> /DEQ                          | 3.35                | 1         |
| I <sub>3</sub> <sup>-</sup> /I <sup>-</sup>    | 3.55                | 3,4       |
| (FePc) <sup>-</sup> / (FePc)                   | 3.55                | 5         |
| TTF <sup>+</sup> / TTF                         | 3.56                | 2         |
| FC <sup>-</sup> / FC                           | 3.60                | 2         |
| TEMPO <sup>+</sup> / TEMPO                     | 3.74                | 6         |
| MOPP <sup>+</sup> / MOPP                       | 3.78                | 1         |
| MPT <sup>+</sup> / MPT                         | 3.81                | 1         |

Table S1 Summary of the charge voltage of Li–O<sub>2</sub> batteries with redox mediators.

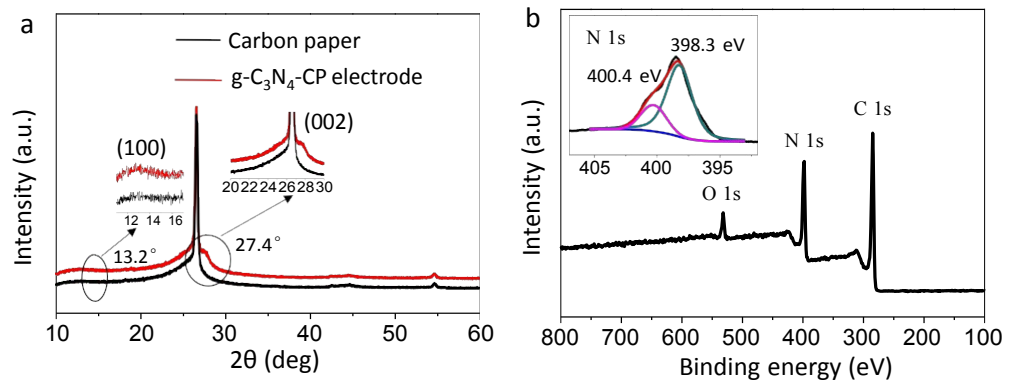

Figure S1 (a) XRD patterns of bare carbon paper and g-C<sub>3</sub>N<sub>4</sub>-CP. (b) XPS of the g-C<sub>3</sub>N<sub>4</sub>-CP electrode.

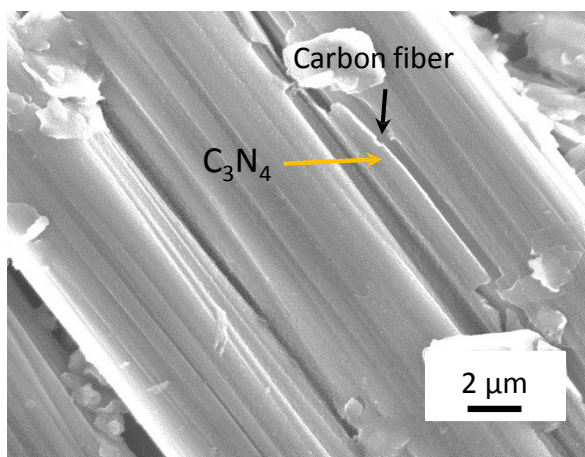

Figure S2 SEM image of g- $C_3N_4$ -CP electrode.

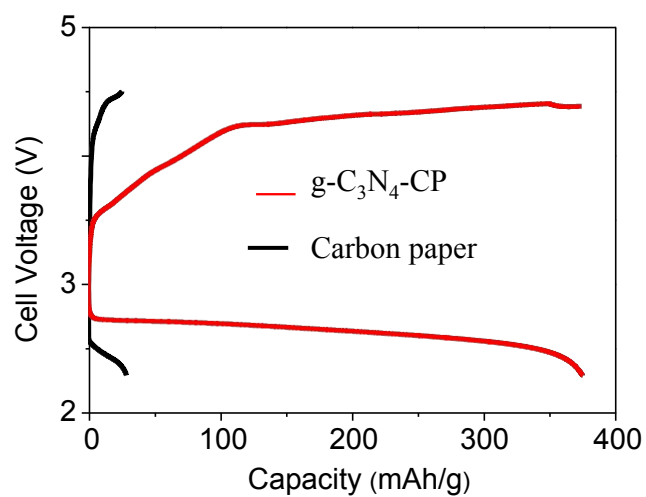

Figure S3 Discharge/charge curves at the current density of  $0.02 \text{ mA cm}^{-2}$  for carbon paper and g-C<sub>3</sub>N<sub>4</sub>-CP electrode.

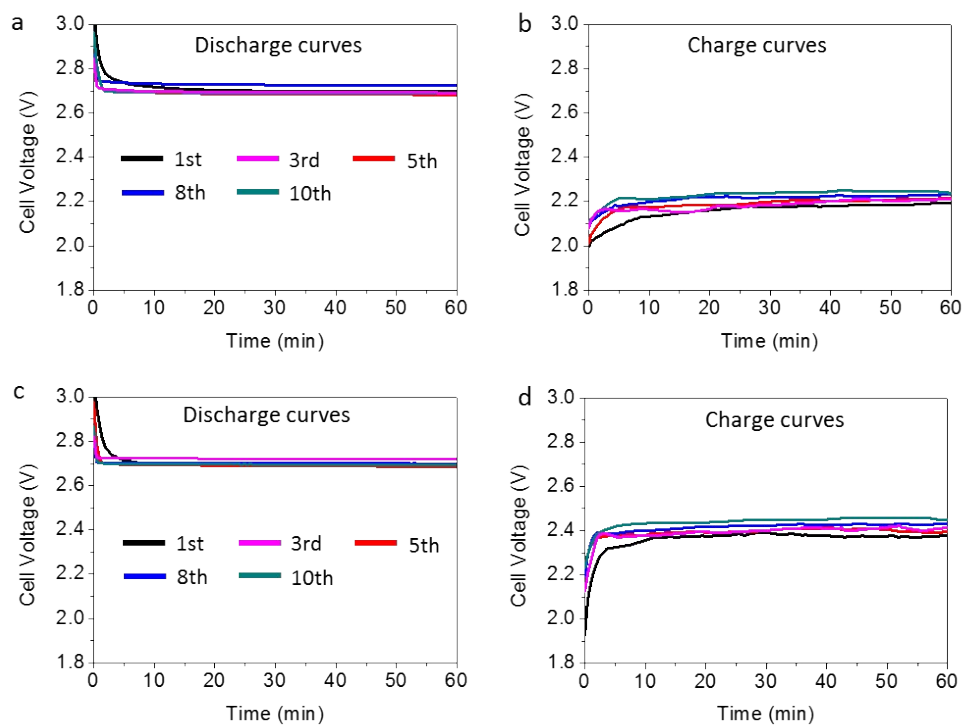

Fig. S4 The discharge curves and the photoassisted charge curves of the photoassisted rechargeable Li-O<sub>2</sub> battery at the current density of (a,b) 0.03 and (c,d) 0.05 mA cm<sup>-2</sup> for 10cycles.

- 1 G. V. Chase, S. Zecevic, T. W. Wesley, J. Uddin, K. A. Sasaki, P. G. Vincent, V. Bryantsev, M. Blanco and D. D. Addison, 2012, US 20120028137A1.
- 2 Y. H. Chen, S. A. Freunberger, Z. Q. Peng, O. Fontaine and P. G. Bruce, *Nat. Chem.* 2013, **5**, 489.
- 3 H.-D. Lim, H. Song, J. Kim, H. Gwon, Y. Bae, K.-Y. Park, J. Hong, H. Kim, T. Kim, Y. H. Kim, X. Lepr, R. Ovalle-Robles, R. H. Baughman and K. Kang, *Angew. Chem. Int. Ed.* 2014, **53**, 3926.
- 4 M. Z. Yu, X. D. Ren, L. Ma and Y. Y. Wu, *Nat. Commun.* 2014, **5**, 5111.

- 5 D. Sun, Y. Shen, W. Zhang, L. Yu, Z. Q. Yi, W. Yin, D. Wang, Y. H. Huang, J. Wang, D. L. Wang and J. B. Goodenough, *J. Am. Chem. Soc.* 2014, **136**, 8941.
- 6 B. J. Bergner, A. Schrmann, K. Pepler, A. Garsuch and J. Janek, *J. Am. Chem. Soc.* 2014, **136**, 15054.
